# Supplementary material for: Mixed-motif interpenetration and cross-linking of high-connectivity networks led to robust and porous metal–organic frameworks with high gas uptake capacities
Source: Royal Society of Chemistry journal article supplement (doi:10.1039/c2sc20172k), 2012-01-01
Supplement: c2sc20172k.pdf [file c2sc20172k.pdf]

## ***Electronic supplementary information (ESI)***

### **Mixed-motif interpenetration and cross-linking of high-connectivity networks lead to robust and porous metal-organic frameworks with high gas uptake capacities**

Liang Wen,<sup>a,b</sup> Peng Cheng,<sup>b</sup> and Wenbin Lin<sup>a,\*</sup>

<sup>a</sup>Department of Chemistry, CB#3290, University of North Carolina, Chapel Hill, North Carolina 27599, USA. E-mail: [wlin@unc.edu](mailto:wlin@unc.edu)

<sup>b</sup>Department of chemistry and Key Laboratory of Advanced Energy Materials Chemistry (MOE), Nankai University, Tianjin 30071, China.

**Material and Methods:** All solvents were purchased from Fisher or TCI and used without further purification. Thermogravimetric analysis (TGA) was performed in air using a Shimadzu TGA-50 equipped with a platinum pan and heated at a rate of 3 °C per minute. Single-crystal X-ray diffraction and Powder X-ray diffraction (PXRD) patterns were collected on a Bruker SMART APEX II diffractometer using Cu radiation. The PXRD patterns were processed with the APEX 2 package using PILOT plug-in. Nitrogen and hydrogen adsorption experiments were performed with Autosorb-1C from Quantachrome, Inc. The methanetetra-(biphenyl-p-carboxylic acid) ligand (**H<sub>4</sub>L**) was synthesized using the literature procedure.<sup>1</sup>

#### **Procedures for crystal growth:**

**Synthesis of [Zn<sub>4</sub>(**L**)(**H<sub>2</sub>L**)<sub>2</sub>]·12DEF·40H<sub>2</sub>O (**1**):** A mixture of **H<sub>4</sub>L** (1 mg, 0.00125 mmol) and Zn(NO<sub>3</sub>)<sub>2</sub>·6H<sub>2</sub>O (2 mg, 0.00672 mmol) was dissolved in DEF (1 mL) and H<sub>2</sub>O (0.1 mL) in a screw capped vial. After addition of 1 μL HCl (3M, aq.), the vial was capped and placed in an oven at 80 °C for five days. Colorless block crystals (0.5 mg, 37%) were obtained after filtration.

**Synthesis of [Co<sub>5</sub>(**L**)(**HL**)<sub>2</sub>]·15DMF·37H<sub>2</sub>O (**2**):** A mixture of **H<sub>4</sub>L** (2.5 mg, 0.003175 mmol) and Co(NO<sub>3</sub>)<sub>2</sub>·6H<sub>2</sub>O (8 mg, 0.0275 mmol) was dissolved in DMF (1 mL) in a screw capped vial. After addition of 5 μL of HCl (3M, aq.), the vial was capped and placed in an oven at 80°C for five days. Needle shaped crystals (1.8 mg, 46%) were obtained after filtration.

#### **X-ray Structure Determination**

All crystallographic measurements were made on a Bruker SMART Apex II CCD-based

X-ray diffractometer system equipped with Cu –target X-ray tube and operated at 1600 watts. The frames were integrated with the Bruker SAINT© build in APEX II software package using a narrow-frame integration algorithm, which also corrects for the Lorentz and polarization effects. Absorption corrections were applied using SADABS. All of the structures were solved by direct methods and refined to convergence by least squares method on  $F^2$  using the SHELXTL software suit. All non-hydrogen atoms are refined anisotropically. SQUEEZE subroutine of the PLATON software suit was applied to remove the scattering from the highly disordered solvent molecules. The resulting new HKL4 files were used to further refine the structures. Datasets for **1** and **2** were collected to  $2\theta = 101^\circ$  and  $71^\circ$  respectively.

**Table S1.** Crystal data and structure refinements for **1** and **2**

| MOF                         | <b>1</b> (Framework)                                              | <b>2</b> (Framework)                                              |
|-----------------------------|-------------------------------------------------------------------|-------------------------------------------------------------------|
| Empirical formula           | C <sub>159</sub> H <sub>100</sub> O <sub>24</sub> Zn <sub>4</sub> | C <sub>159</sub> H <sub>100</sub> O <sub>25</sub> Co <sub>5</sub> |
| Formula weight              | 2556.08                                                           | 2604.24                                                           |
| Temperature                 | 100(2) K                                                          | 100(2) K                                                          |
| Wavelength                  | 1.54178 Å                                                         | 1.54178 Å                                                         |
| Crystal system, space group | Monoclinic, P21                                                   | Monoclinic, P21                                                   |
| Unit cell dimensions        | a = 20.6536(3) Å                                                  | a = 19.3772(8) Å                                                  |
|                             | b = 33.4974(5) Å                                                  | b = 34.3744(10) Å                                                 |
|                             | c = 20.7926(3) Å                                                  | c = 20.7308(7) Å                                                  |
|                             | $\alpha = \gamma = 90^\circ$                                      | $\alpha = \gamma = 90^\circ$                                      |
|                             | $\beta = 118.6190(10)^\circ$                                      | $\beta = 115.432(2)^\circ$                                        |
| Volume                      | 12627.7(3) Å <sup>3</sup>                                         | 12470.3(8) Å <sup>3</sup>                                         |
| Z, Calculated density       | 2, 0.672 Mg/m <sup>3</sup>                                        | 2, 0.694 Mg/m <sup>3</sup>                                        |

|                                   |                                             |                                             |
|-----------------------------------|---------------------------------------------|---------------------------------------------|
| Absorption coefficient            | 0.740 mm <sup>-1</sup>                      | 2.869 mm <sup>-1</sup>                      |
| F(000)                            | 2534                                        | 2578                                        |
| Crystal size                      | 0.2 x 0.2 x 0.2 mm                          | 0.10 x 0.1 x 0.1 mm                         |
| Theta range for data collection   | 2.42 to 55.19 deg.                          | 2.36 to 42.08 deg.                          |
| Limiting indices                  | -21<=h<=21, -33<=k<=35, -22<=l<=21          | -12<=h<=16, -29<=k<=29, -18<=l<=17          |
| Reflections collected / unique    | 27767/20758 [R(int) = 0.0512]               | 14527 / 9315 [R(int) = 0.0585]              |
| Completeness to theta =           | 99.0%                                       | 99.0 %                                      |
| Max. and min. transmission        | 0.8660 and 0.8660                           | 0.7624 and 0.7624                           |
| Refinement method                 | Full-matrix least-squares on F <sup>2</sup> | Full-matrix least-squares on F <sup>2</sup> |
| Data / restraints / parameters    | 27767 / 195 / 747                           | 14527 / 200 / 765                           |
| Goodness-of-fit on F <sup>2</sup> | 1.320                                       | 0.813                                       |
| Final R indices [I>2sigma(I)]     | R1 = 0.0868, wR2 = 0.2131                   | R1 = 0.0602, wR2 = 0.1493                   |
| R indices (all data)              | R1 = 0.1038, wR2 = 0.2226                   | R1 = 0.0912, wR2 = 0.1655                   |
| Absolute structure parameter      | 0.04(3)                                     | 0.006(4)                                    |
| Largest diff. peak and hole       | 1.168 and -2.950 e.A <sup>-3</sup>          | 0.337 and -0.615 e.A <sup>-3</sup>          |

<sup>a</sup>R(F) =  $\Sigma||F_o| - |F_c||/\Sigma|F_o|$ . <sup>b</sup>RW(F<sup>2</sup>) =  $[\Sigma\{w(F_o^2 - F_c^2)^2\}/\Sigma\{w(F_o^2)^2\}]^{0.5}$ ;  $w^{-1} = \sigma^2(F_o^2) + (aP)^2 + bP$ , where  $P = [F_o^2 + 2F_c^2]/3$  and a and b are constants adjusted by the program.

**Quantitative determination of solvent molecules in 1 and 2:** Sample of **1** and **2** were treated in exactly the same way for both <sup>1</sup>H NMR and TGA experiments. Fresh crystals were harvested by quick filtration, and briefly dried on filter paper under air. The sample was then

loaded into screw-capped vial or the sample tray in TGA. To the weighted sample in the crew-capped vial, 0.75 mL CD<sub>3</sub>OD was added. 5 or 3 µL mesitylene (Mes) was then added as an internal standard. After soaking overnight, the <sup>1</sup>H NMR spectrum was taken on a 400 MHz Burker NMR spectrometer. The organic solvent inside the crystals is DEF or DMF which has been exchanged by CD<sub>3</sub>OD, and its exact amount was determined by calibrating against the internal standard. The total amounts of the solvents were obtained by TGA, the amount of water molecules was calculated by subtracting DEF/DMF from the total solvent amount.

**1:**

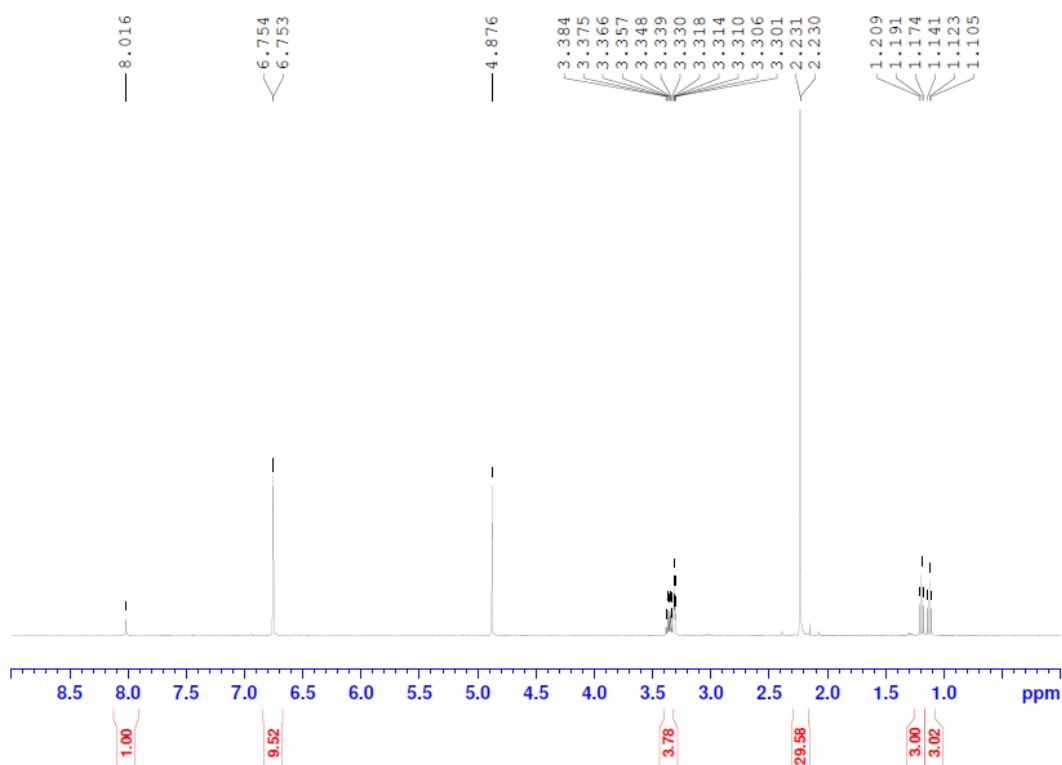

**Figure S1.** <sup>1</sup>H NMR spectroscopic determination of solvent content in **1**; mesitylene was added as an internal standard.

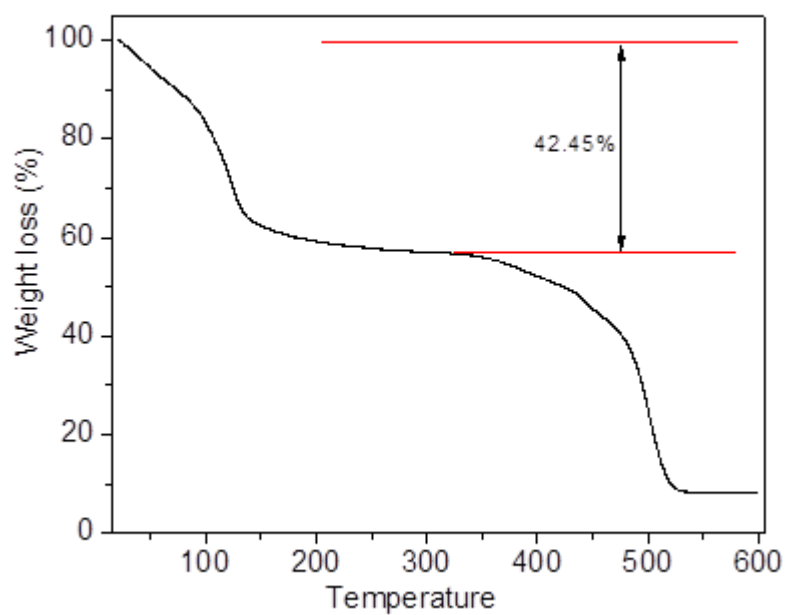

**Figure S2.** TGA cure for fresh crystals of **1**.

|                                                                                                        |       |
|--------------------------------------------------------------------------------------------------------|-------|
| $W_{\text{crystal}}$ (mg)                                                                              | 4.30  |
| $W_{\text{mesitylene}}$ (mg)                                                                           | 4.34  |
| $W_{\text{DEF}}$ (mg) (From NMR)                                                                       | 1.15  |
| $W_{\text{DEF}}\%$                                                                                     | 26.74 |
| $W_{\text{DEF}+\text{H}_2\text{O}}\%$ (From TGA)                                                       | 42.45 |
| $W_{\text{H}_2\text{O}}\%$                                                                             | 15.72 |
| Formula: $[\text{Zn}_4(\text{L})(\text{H}_2\text{L})_2] \cdot 12\text{DEF} \cdot 40\text{H}_2\text{O}$ |       |

**2:**

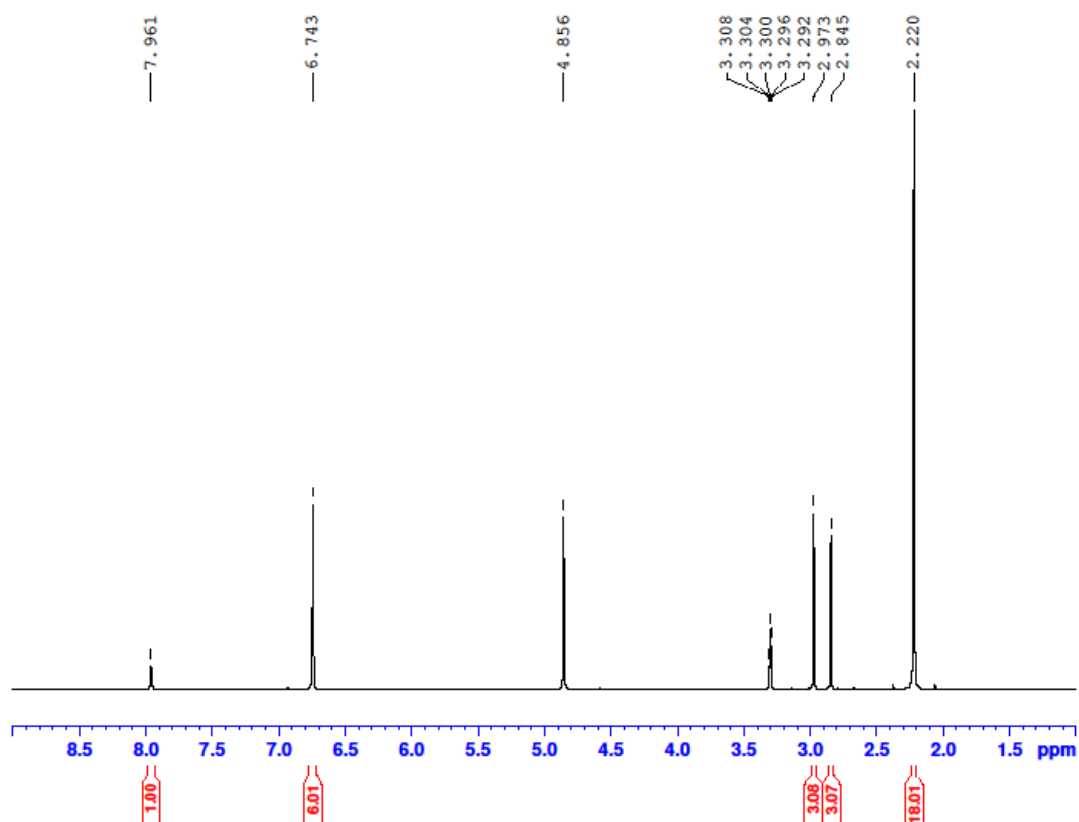

**Figure S3.**  $^1\text{H}$  NMR spectroscopic determination of solvent content in **2**; mesitylene was added as an internal standard.

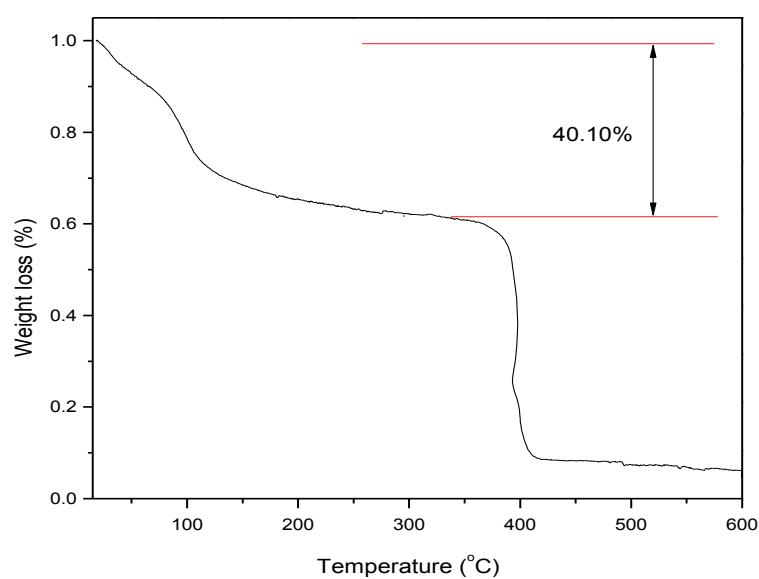

**Figure S4.** TGA curve for fresh crystals of **2**

|                                                                                                      |       |
|------------------------------------------------------------------------------------------------------|-------|
| $W_{\text{crystal}}$ (mg)                                                                            | 3.14  |
| $W_{\text{mesitylene}}$ (mg)                                                                         | 2.60  |
| $W_{\text{DMF}}$ (mg) (From NMR)                                                                     | 0.79  |
| $W_{\text{DMF}}\%$                                                                                   | 25.11 |
| $W_{\text{DEF+H}_2\text{O}}\%$ (From TGA)                                                            | 40.10 |
| $W_{\text{H}_2\text{O}}\%$                                                                           | 14.99 |
| <b>Formula:</b> $[\text{Co}_5(\text{L})(\text{HL})_2] \cdot 15\text{DMF} \cdot 37\text{H}_2\text{O}$ |       |

a)

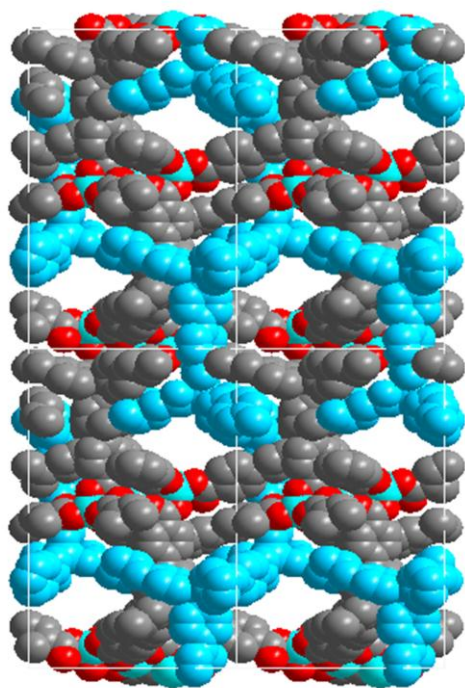

b)

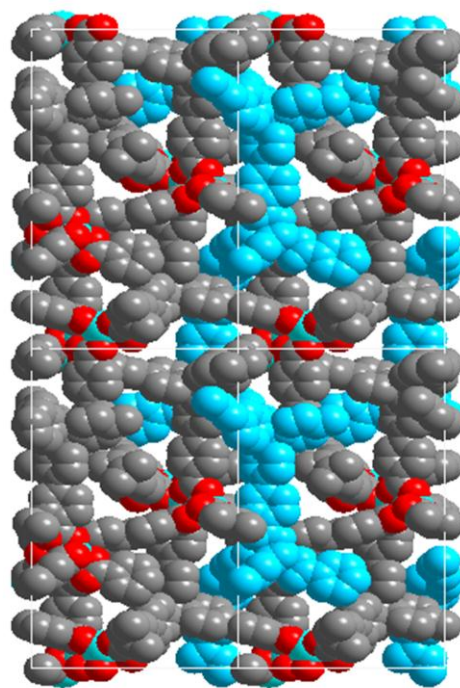



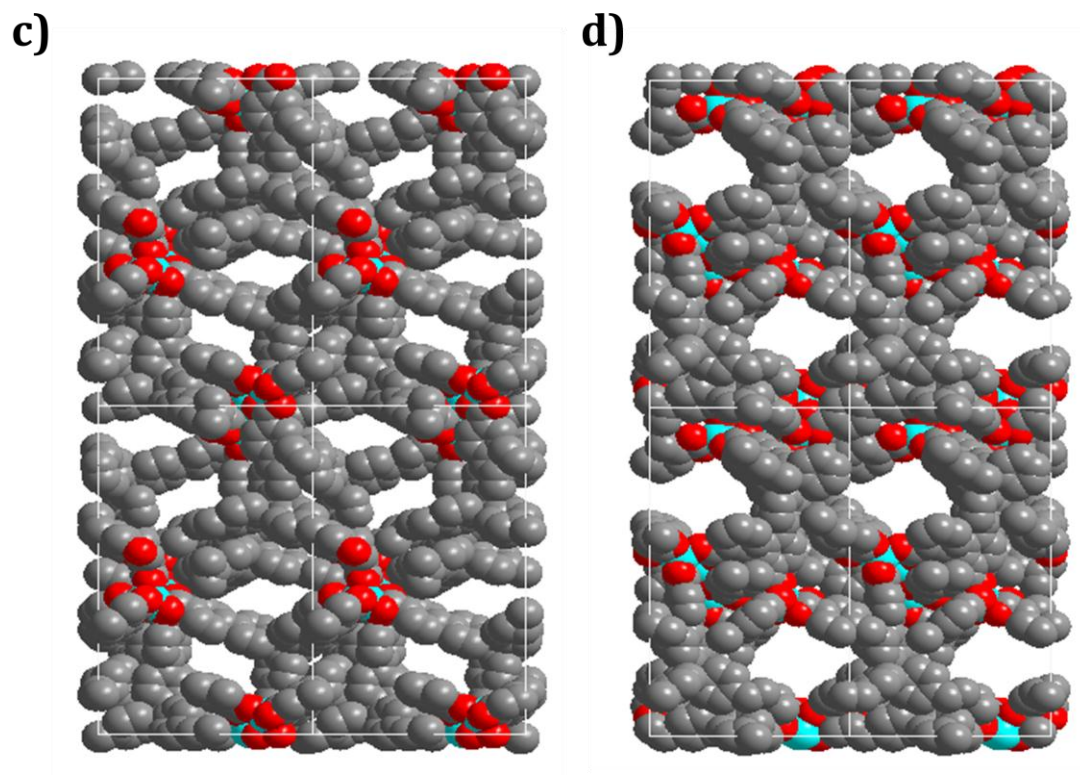

**Figure S5.** Space-filling model of **1** along the *a* axis (a) and the *b* axis (b) and of **2** along the *a* axis (c) and the *b* axis (d). Hydrogen atoms and guest molecules are omitted for clarity.

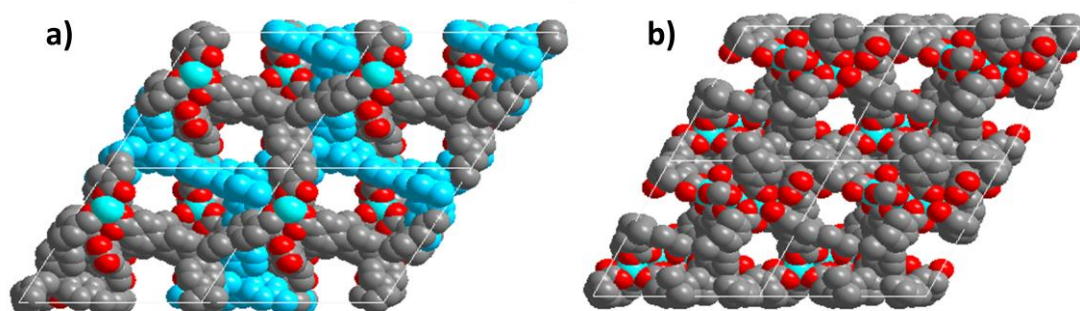

**Figure S6.** Space-filling model of **1** (a) and **2** (b) as viewed along the *b* axis. Hydrogen atoms and guest molecules are omitted for clarity.

**Powder X-ray diffraction (PXRD) results:**



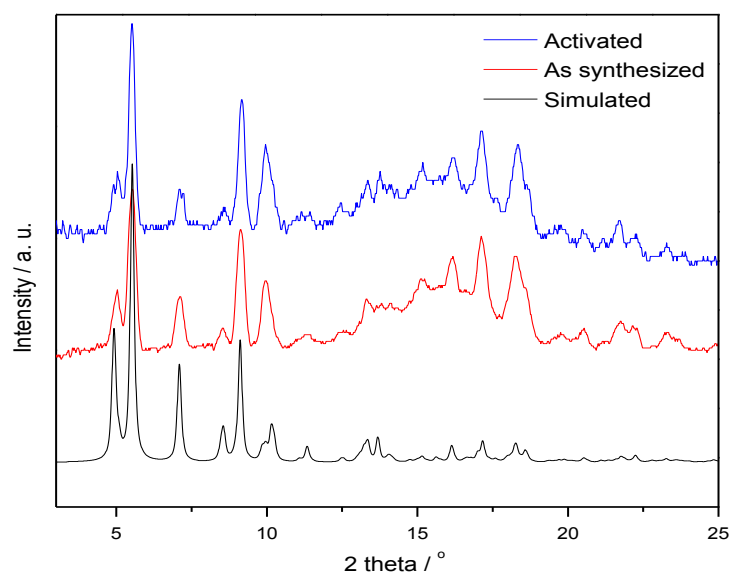

**Figure S7.** Powder X-ray diffraction patterns of as synthesized crystals of **1**, **1** after activation, and calculated PXRD pattern of **1**.

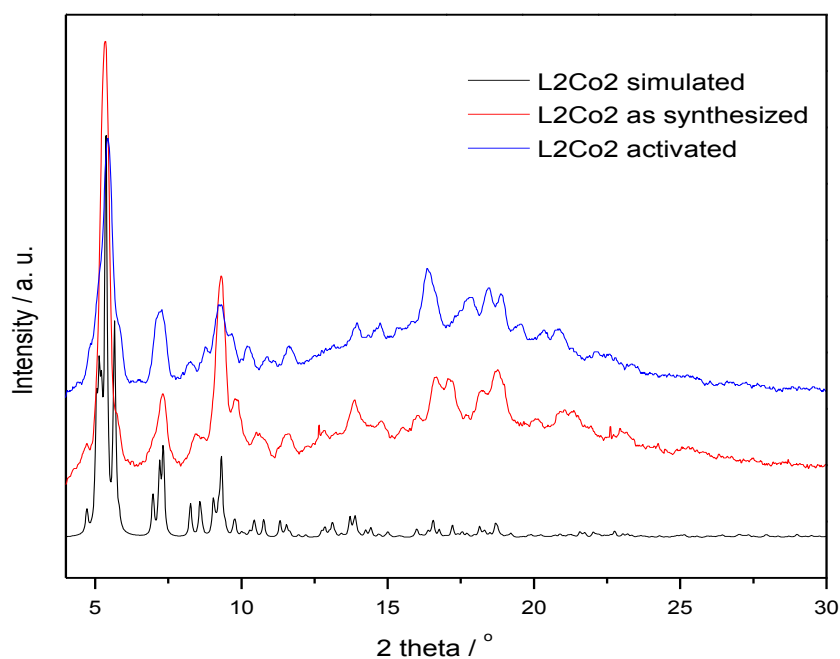

**Figure S8.** Powder X-ray diffraction patterns of as synthesized crystals of **2**, **2** after activation, and calculated PXRD pattern of **2**.

**Analysis of sorption isotherms:**

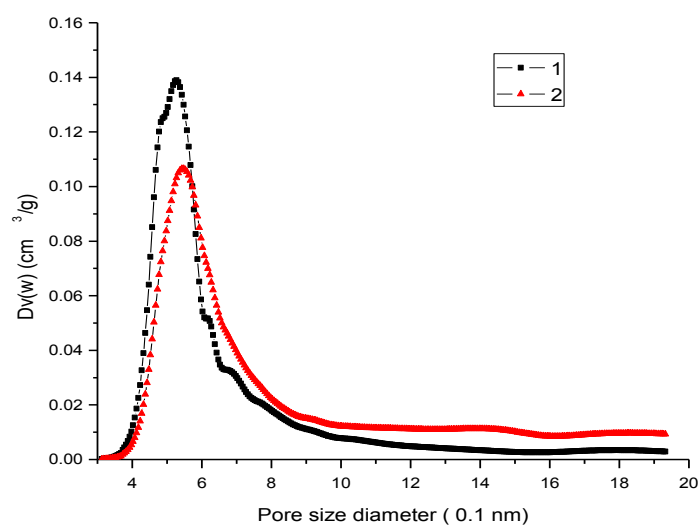

**Figure S9.** Pore size distribution for **1** (black) and **2** (red)

**Table 2** Gas uptake data of **1** and **2**

| MOF | gas             | Temp. | amount of gas adsorb     |        | Surface Area (m <sup>2</sup> /g) |          |
|-----|-----------------|-------|--------------------------|--------|----------------------------------|----------|
|     |                 |       | cm <sup>3</sup> /g (STP) | mmol/g | wt% BET                          | Langmuir |
| 1   | N <sub>2</sub>  | 77K   | 345.45                   | 15.42  | 1284                             | 1588     |
|     | H <sub>2</sub>  | 77K   | 229.98                   | 10.27  | 2.07                             |          |
|     | CO <sub>2</sub> | 273K  | 101.74                   | 4.54   |                                  |          |
|     |                 | 298K  | 63.06                    | 2.82   |                                  |          |
| 2   | N <sub>2</sub>  | 77K   | 262.00                   | 11.70  | 965                              | 1051     |
|     | H <sub>2</sub>  | 77K   | 149.76                   | 6.69   | 1.35                             |          |
|     | CO <sub>2</sub> | 273K  | 75.99                    | 3.39   |                                  |          |
|     |                 | 298K  | 50.31                    | 2.25   |                                  |          |

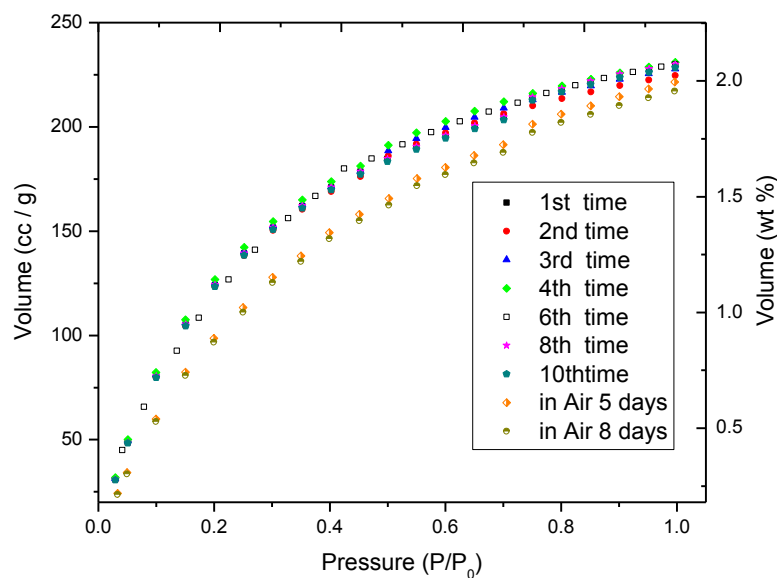

**Figure S10.** Repeated runs of H<sub>2</sub> adsorption isotherms of **1** at 77 K.

#### Analysis of isosteric adsorption enthalpy:

The isosteric heat of adsorption  $Q_{st}$  was determined by Virial Method (equation 1) from CO<sub>2</sub> adsorption isotherms at 293 K and 298 K,

$$\ln(p) = \ln(n) + 1/T \sum_{i=0}^m a_i n^i + \sum_{j=0}^n b_j n^j \quad (1)$$

Where  $p$  is the pressure expressed in mbar,  $n$  is the amount adsorbed in mmol/g,  $T$  is the temperature in K,  $a_i$  and  $b_j$  are virial coefficients, and  $m$ ,  $n$  represent the number of coefficients. The values of the virial coefficients  $a_0$  through  $a_m$  were then used to calculate the isosteric heat of adsorption using equation (2).  $Q_{st}$  is the coverage-dependent isosteric heat of adsorption and  $R$  is the universal gas constant.

$$Q_{st} = -R \sum_{i=0}^m a_i n^i$$

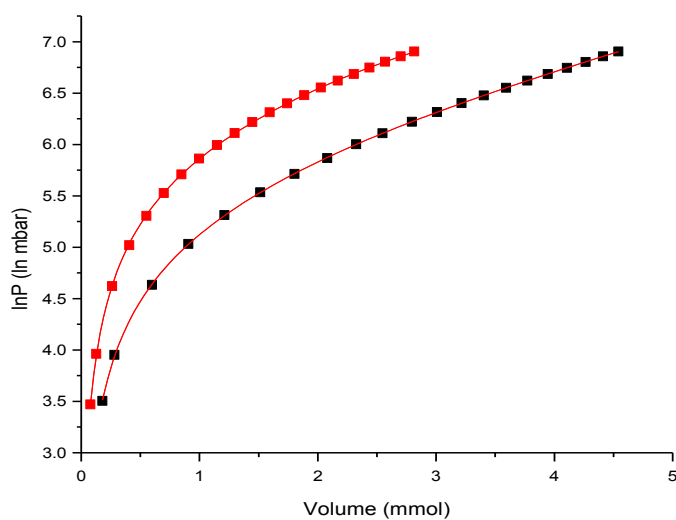

**Figure S11.** Virial expression fitting graphs for CO<sub>2</sub> adsorption data for **2** at 273K (black) and 298K (red). Fitting error = 0.011,  $R^2 = 0.99994$ .

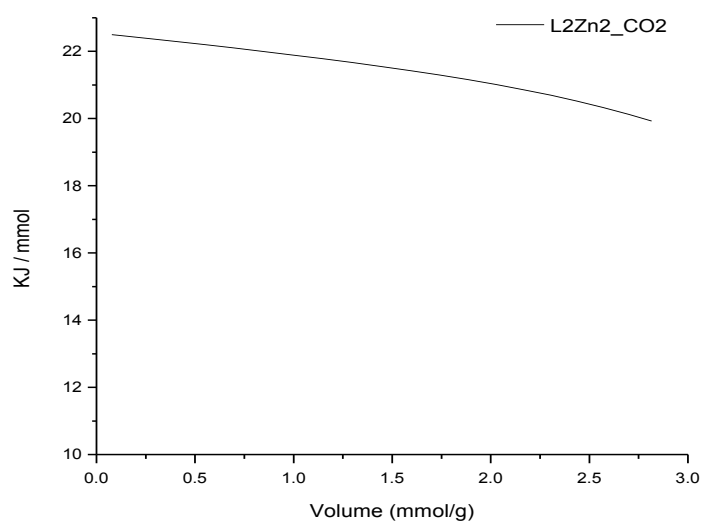

**Figure S12.** Isothermic heat of CO<sub>2</sub> adsorption for **1**.

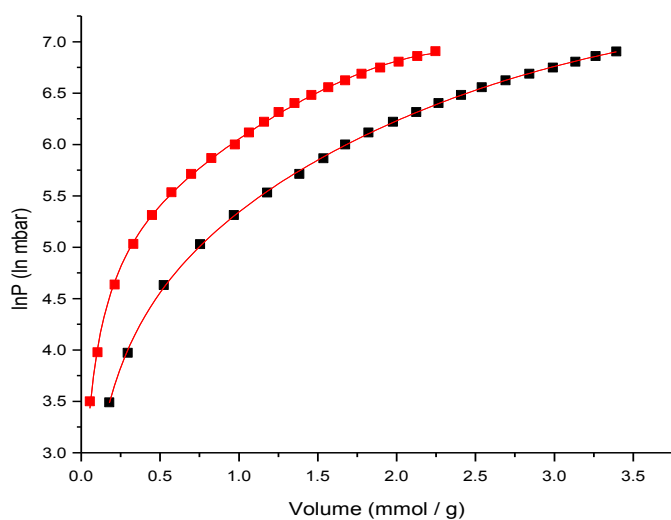

**Figure S13.** Virial expression fitting graphs for CO<sub>2</sub> adsorption data for **2** at 273K (black) and 298K (red). Fitting error = 0.029,  $R^2 = 0.9990$ .

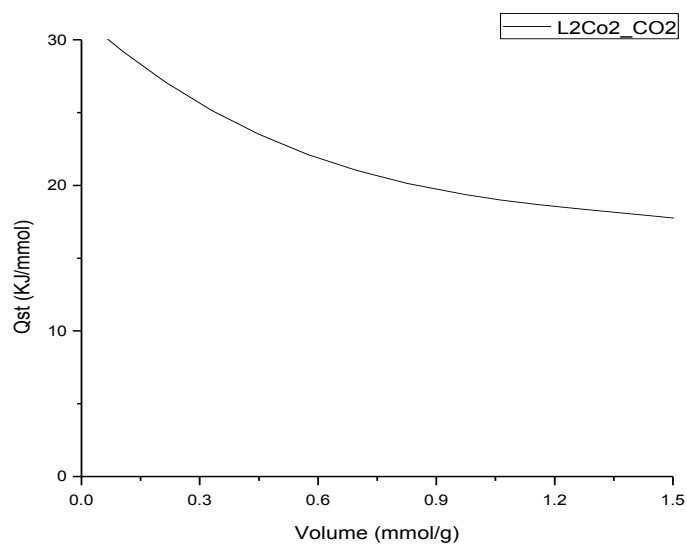

**Figure S14.** Isostatic heat of CO<sub>2</sub> adsorption for **2**.

#### Reference:

1. L. Ma, A. Jin, Z. Xie and W. Lin, *Angew. Chem. Int. Ed.*, 2009, **48**, 9905-9908.
